# Dorsal Striatum and Its Limbic Connectivity Mediate Abnormal Anticipatory Reward Processing in Obesity

Lauri Nummenmaa<sup>1,2,3\*</sup>, Jussi Hirvonen<sup>3</sup>, Jarna C. Hannukainen<sup>3</sup>, Heidi Immonen<sup>3,4</sup>, Markus M. Lindroos<sup>3</sup>, Paulina Salminen<sup>5</sup>, Pirjo Nuutila<sup>3,4</sup>

**1** Brain Research Unit, Olli Viktor Lounasmaa Laboratory, Aalto University School of Science, Espoo, Finland, **2** Department of Biomedical Engineering and Computational Science, Aalto University School of Science, Espoo, Finland, **3** Turku Positron Emission Tomography (PET), Centre, Turku, Finland, **4** Department of Medicine, University of Turku, Turku, Finland, **5** Department of Surgery, University of Turku, Turku, Finland

## Abstract

Obesity is characterized by an imbalance in the brain circuits promoting reward seeking and those governing cognitive control. Here we show that the dorsal caudate nucleus and its connections with amygdala, insula and prefrontal cortex contribute to abnormal reward processing in obesity. We measured regional brain glucose uptake in morbidly obese ( $n = 19$ ) and normal weighted ( $n = 16$ ) subjects with 2-[18F]fluoro-2-deoxyglucose ( $[^{18}\text{F}]\text{FDG}$ ) positron emission tomography (PET) during euglycemic hyperinsulinemia and with functional magnetic resonance imaging (fMRI) while anticipatory food reward was induced by repeated presentations of appetizing and bland food pictures. First, we found that glucose uptake rate in the dorsal caudate nucleus was higher in obese than in normal-weight subjects. Second, obese subjects showed increased hemodynamic responses in the caudate nucleus while viewing appetizing versus bland foods in fMRI. The caudate also showed elevated task-related functional connectivity with amygdala and insula in the obese versus normal-weight subjects. Finally, obese subjects had smaller responses to appetizing versus bland foods in the dorsolateral and orbitofrontal cortices than did normal-weight subjects, and failure to activate the dorsolateral prefrontal cortex was correlated with high glucose metabolism in the dorsal caudate nucleus. These findings suggest that enhanced sensitivity to external food cues in obesity may involve abnormal stimulus-response learning and incentive motivation subserved by the dorsal caudate nucleus, which in turn may be due to abnormally high input from the amygdala and insula and dysfunctional inhibitory control by the frontal cortical regions. These functional changes in the responsiveness and interconnectivity of the reward circuit could be a critical mechanism to explain overeating in obesity.

**Citation:** Nummenmaa L, Hirvonen J, Hannukainen JC, Immonen H, Lindroos MM, et al. (2012) Dorsal Striatum and Its Limbic Connectivity Mediate Abnormal Anticipatory Reward Processing in Obesity. PLoS ONE 7(2): e31089. doi:10.1371/journal.pone.0031089

**Editor:** Ya-Ping Tang, Louisiana State University Health Sciences Center, United States of America

**Received:** August 19, 2011; **Accepted:** January 2, 2012; **Published:** February 3, 2012

**Copyright:** © 2012 Nummenmaa et al. This is an open-access article distributed under the terms of the Creative Commons Attribution License, which permits unrestricted use, distribution, and reproduction in any medium, provided the original author and source are credited.

**Funding:** This work was supported by the Academy of Finland (grants #256147 and #251125 <http://www.aka.fi>) to LN, by the Aalto University (AivoAALTO Grant, <http://www.aalto.fi>) Sigrid Juselius foundation ([www.sigridjuselius.fi/foundation](http://www.sigridjuselius.fi/foundation)) Turku University Hospital (EVO grant <http://www.tyks.fi>). The funders had no role in study design, data collection and analysis, decision to publish, or preparation of the manuscript.

**Competing Interests:** The authors have declared that no competing interests exist.

\* E-mail: nummenmaa@neuro.hut.fi

## Introduction

In most western countries the annual increase in the prevalence and the severity of obesity is currently substantial [1]. Unrestricted availability of palatable foods is the most obvious environmental factor that promotes obesity [2], and genes promoting rapid intake of energy via high sugar and fat intake under conditions of food scarcity have become a liability in the modern societies where high-caloric food is ubiquitously available. To fight the current obesity epidemic it is thus imperative to understand which factors determine whether food consumption is pursued or restrained. Eating provides nutrients but is also highly reinforcing, because it induces intense feelings of pleasure and reward. Comparative studies have established that an interconnected *reward circuit* comprising of subcortical (amygdala, hypothalamus, striatum) and frontocortical (motor, premotor, orbital and medial prefrontal) areas plays a key role in guiding appetitive behaviours [3,4,5]. Functional imaging studies in humans have further shown that subcomponents of the reward circuit contribute to processing of external food cues such as pictures of foods [6,7,8,9], and dysfunctions of the reward circuit have also been associated with

both obesity and drug addiction. [2,10,11,12,13,14]. In the present study we show how tonic activity, regional responses as well as interconnectivity of the reward circuit may be the critical mechanisms explaining overeating and obesity.

Palatable foods carry strong motivational power. Mere sight of a delicious cake or the smell of our favourite food may elicit a strong urge for eating right now, and exposure to such cues may override physiological satiety signals and trigger food consumption [15]. Overeating thus likely depends on the balance between the reward circuit and networks that inhibit reward seeking, such as the dorsolateral prefrontal cortices [16,17,18]. The extant literature from imaging studies in humans suggests that obesity is characterized by an imbalance in these systems, in that the reward circuit it is overactive to reward anticipation in obesity and that inhibitory networks may fail to exert control over the the reward circuit [2,10,11,12,13,14,19]. There are large individual differences in the reward circuit's responsiveness towards foods, and this may be a critical factor contributing to overeating and obesity [2]. The personality trait reward drive is positively associated with food cravings and body weight [20], and fMRI studies have revealed that it also predicts ventral striatum's

responses to appetizing food pictures in normal-weight individuals [21]. Similarly, self-reported sensitivity to external food cues is positively correlated with the interconnectivity of the reward circuit [22]. In line with these findings, fMRI studies have confirmed that the reward circuit of obese individuals is hypersensitive to the mere sight of foods. Obese individuals show elevated responses to food pictures in amygdala, caudate nucleus and anterior cingulate cortex [10,19], and it has been proposed that this hyperactivity of the dopaminergic reward circuit may render obese individuals prone to overeating. PET studies have further demonstrated dopaminergic commonalities in the mechanisms of drug abuse and excessive food intake, suggesting that at least in some cases obesity might be characterized as a 'food addiction'. Dopaminergic reward pathways in the midbrain modulate both food and drug consumption [23] particularly by means of creating sensations of food and drug craving [24], and both drugs and food exert their reinforcing effects by increasing dopamine in limbic regions. Patients with addictive disorders show tonically lower baseline D<sub>2</sub> receptor (D<sub>2</sub>R) density in the striatum, and blunted dopamine release following the administration of the drug of abuse. Similar to drugs of abuse, food consumption is associated with dopamine release in the dorsal striatum in healthy subjects, and the amount of dopamine released is correlated positively with ratings of food pleasantness [12]. Similar to patients with addictive disorders, obese subjects have lower baseline striatal D<sub>2</sub>R density, which is directionally proportional to BMI [11].

Although altered sensitivity of the reward circuit may be a critical factor explaining obesity, it remains elusive how exactly the reward circuitry contributes to food-related anticipatory reward functions in obese individuals. First, previous demonstrations of elevated reward circuit responses to foods in normal-weight and obese subjects [10,19] have not addressed differences in the tonic baseline activity of the reward circuit in the brain. Tonically low glucose metabolism in the prefrontal cortex predicts low striatal dopamine D<sub>2</sub> receptor density - a hallmark of dysregulated reward circuit - in obese subjects [17]. However, whether tonic activity of the neural networks that process anticipatory reward predicts functional responses to external food cues is unknown. Second, only a handful of studies have taken a systems-level approach for testing whether obesity would alter the functional *connectivity* of the reward circuit. While a recent imaging study in healthy humans demonstrated that connectivity within the human reward circuit is dependent on individual sensitivity to external food cues [22], another involving obese and normal-weight individuals suggested that obesity is specifically associated with deficient functional connectivity from amygdala to the orbitofrontal cortex, (OFC) and heightened connectivity from the OFC to ventral striatum [25]. However, the exact neural mechanisms underlying these functional changes remain unknown.

In this study we applied multimodal brain imaging by combining [<sup>18</sup>F]FDG PET with an fMRI experiment involving anticipatory reward induced by presentation of appetizing and bland food pictures. Note that although no rewards were actually delivered to the participants, we use the term 'anticipatory reward' for the sake of conciseness, as seeing highly rewarding targets such as foods reliably induces reward anticipation responses in the ventral striatum, even when no rewards are actually delivered [21]. It has been established that glucose utilization is tightly associated with spiking frequency [26], hence the glucose metabolism rates can be used to measure tonic baseline activation of the brain during rest. By using primed hyperinsulinemic clamp [27] during the PET scan, we were able to compare obese and normal-weight individuals' brain glucose metabolism in a situation where the body is in a satiated state in terms of insulin signaling.

The fMRI experiment enabled us to compare whether obese and normal-weight individuals differ with respect to both regional brain responses and effective connectivity of the reward circuit during viewing of appetizing vs. bland foods. Finally, combining the PET and fMRI data enabled us to use the regional glucose metabolic rates (GMRs) derived in the PET scan to predict brain responses to appetizing foods in the fMRI experiment.

## Materials and Methods

### Participants

The Ethical Committee of the Hospital District of South-Western Finland approved the study protocol and all participants signed ethical committee-approved, informed consent forms. The study was conducted in accordance with the Declaration of Helsinki. Table 1 presents a summary of the participants. The obese group consisted of nineteen neurologically intact morbidly obese subjects ( $M_{\text{BMI}} = 43.87$ ,  $SD_{\text{BMI}} = 6.60$ ). Five of them used oral antidiabetic medication and were excluded from the PET studies. Sixteen neurologically intact normal-weight volunteer subjects served as controls ( $M_{\text{BMI}} = 24.10$ ,  $SD_{\text{BMI}} = 2.07$ ) and were matched with the patients with respect to age, height, and indices of hypertension (i.e. blood pressure). Eating disorders, severe mental disorders and substance abuse were exclusion criteria for all participants. One normal-weight subject **was excluded from the fMRI data analyses due to excessive head motion.**

### Behavioural measurements

Prior to the experiment, participants rated their feeling of hunger using a visual analogue scale. After the fMRI experiment, the participants rated the valence (pleasantness versus unpleasantness) of the experimental stimuli on a computer using the Self-assessment Manikin [28] with a scale ranging from 1 (unpleasant) to 9 (pleasant).

### PET acquisition and analyses

The studies were performed after 12 hours fasting. Subjects refrained from caffeine-containing drinks and from smoking 24 hours before PET studies. Any kind of strenuous physical activity was prohibited from the preceding evening. Two catheters were inserted into antecubital veins, one for saline, insulin and glucose infusions and injection of radiotracer [<sup>18</sup>F] FDG, and another into the opposite warmed arm for sampling of arterialized blood. The euglycemic hyperinsulinemic clamp technique was used as previously described [27]. The rate of insulin infusion was  $1 \text{ mU} \cdot \text{kg}^{-1} \cdot \text{min}^{-1}$  (Actrapid, Novo Nordisk, Copenhagen, Denmark). During hyperinsulinemia, euglycemia was maintained by infusing 20% glucose intravenously. The rate of glucose infusion was adjusted according to plasma glucose concentrations measured every 5–10 min from arterialized blood. At the time point  $100 \pm 10$  minutes of euglycemic hyperinsulinemic clamp, [<sup>18</sup>F]FDG ( $189 \pm 9 \text{ MBq}$ ) was injected intravenously over 40 second and the dynamic brain scan for 40 min (frames;  $4 \cdot 30 \text{ s}$ ,  $3 \cdot 60 \text{ s}$ ,  $7 \cdot 300 \text{ s}$ ) started. During the scan arterial blood samples were drawn for radioactivity analysis. A GE Advance PET scanner (General Electric Medical Systems, Milwaukee, WI, USA) with resolution of 4.25 mm was used for PET studies as previously described [29,30]. [<sup>18</sup>F]FDG was synthesized as previously described [31]. Plasma radioactivity was measured with an automatic gamma counter (Wizard 1480 3", Wallac, Turku, Finland).

Cerebral glucose uptake rate was measured for each voxel separately from dynamic PET scans as described previously [29,30], except that a lumped constant of 0.8 was used [32].

**Table 1.** Characteristics of the participants.

|                                      | Obese subjects (n = 19) |       | Normal-weight subjects (n = 16) |       | p     |
|--------------------------------------|-------------------------|-------|---------------------------------|-------|-------|
|                                      | M                       | SD    | M                               | SD    |       |
| Age (years)                          | 45.74                   | 9.60  | 47.75                           | 10.44 | ns.   |
| Weight (kg)                          | 123.03                  | 11.20 | 71.43                           | 12.00 | <.001 |
| Height (cm)                          | 167.47                  | 6.46  | 171.59                          | 10.34 | ns.   |
| BMI                                  | 43.87                   | 3.74  | 24.10                           | 2.07  | <.001 |
| Percentage of fat*                   | 48.27                   | 6.60  | 29.37                           | 6.37  | <.001 |
| Systolic blood pressure (mmHg)       | 133.94                  | 14.06 | 125.71                          | 12.52 | ns.   |
| Diastolic blood pressure (mmHg)      | 85.83                   | 8.21  | 80.43                           | 8.59  | ns.   |
| Appetizing foods rating <sup>#</sup> | 6.16                    | 1.13  | 5.97                            | 1.08  | ns.   |
| Bland foods rating <sup>#</sup>      | 5.18                    | 1.59  | 4.68                            | 1.65  | ns.   |
| Cars rating <sup>#</sup>             | 5.55                    | 1.51  | 4.67                            | 2.02  | ns.   |
| VAS hunger rating                    | 28.20                   | 24.87 | 36.75                           | 28.19 | ns.   |

Last column indicates significant between-groups differences in a two-sample *t* test.

Note.

\*Measured using the bioelectrical impedance analysis (BIA) technique with an Omron device.

<sup>#</sup>Measured with the Self-assessment Manikin using a scale ranging from 1 to 9.

doi:10.1371/journal.pone.0031089.t001

Normalization and statistical analyses of the parametric glucose metabolism images were carried out with SPM 5 software ([www.fil.ion.ucl.ac.uk/spm/](http://www.fil.ion.ucl.ac.uk/spm/)). Parametric images were normalized into an in-house glucose metabolism template in MNI space using linear and nonlinear transformations, and smoothed with a Gaussian kernel of FWHM 10-mm. Simple *t*-contrasts for the normalized parametric images were used to analyze group differences in glucose metabolism. The statistical threshold was set at  $p < .001$ , uncorrected, with a minimum cluster size of 100 contiguous voxels. For small volume corrections (SVC) in the PET data, anatomically defined *a priori* regions of interest within the reward system (caudate nucleus, amygdala, thalamus, insula and orbitofrontal cortex) were defined using the WFU pickatlas [33] and AAL [34] atlas.

### Experimental Design for fMRI

Stimuli and design are summarized in Figure 1. The stimuli were digitized full-color photographs of appetizing foods (e.g. chocolate, pizza, steak), bland foods (e.g. lentils, cabbage, crackers) and cars matched with respect to low-level visual features such as mean luminosity, RMS contrast and global energy. An independent sample of 29 healthy volunteers rated the valence (unpleasantness versus pleasantness) of the stimuli with the SAM. Analysis of the valence ratings ( $M_{\text{appetizing}} = 6.64$ ,  $M_{\text{bland}} = 3.93$ ,  $M_{\text{cars}} = 4.41$ ) established that the appetizing foods were rated as more pleasant than the bland foods,  $t(28) = 10.97$ ,  $p < .001$ , and cars,  $t(28) = 7.52$ ,  $p < .001$ , but there were no differences in the pleasantness of the bland foods and cars,  $t(28) = 1.19$ .

While being scanned the subjects viewed alternating 15.75-second epochs containing six stimuli from one category (appetizing foods, bland foods or cars) intermixed with three null events. In order to study implicit processing of the food images, we used brief stimulus display durations and a behavioural task that was unrelated to the hedonic value of the stimuli: A single trial comprised a 1000 ms presentation of a stimulus image followed by a low contrast central cross (750 ms). Null events comprised a 1750 ms presentation of a low-contrast cross. The food and car stimuli were displaced slightly to the left or to the right of the screen, and the participants were instructed to press the left or

right button according to which side the stimulus was presented. On null trials no response was demanded. The order of the stimuli during each epoch was pseudo-randomized with respect to trial type (stimulus or null), such that no more than three consecutive trials were of the same type. This pseudo-randomization enhanced design efficiency while preserving the unpredictability of stimulus onsets in naïve participants [35]. Visual field of the stimuli was randomized and fully counterbalanced. Altogether there were a total of 72 appetizing food trials (in 12 epochs), 72 bland food trials (in 12 epochs) and 144 car trials (in 24 epochs). To maximize the power of the design and to prevent carryover effects of viewing appetizing foods, the order of the stimulus epochs was fixed in such way that car stimulus epoch was always presented between the appetizing and bland stimulus epochs. The starting epoch of the task was counterbalanced across participants. The total task duration was 14 minutes. Participants practiced the task outside the scanner prior to starting the fMRI experiment.

### fMRI Acquisition and Analysis

Scanning sessions took place around morning or early noon (9 a.m.–2 p.m.) Participants were instructed to refrain from eating and drink only water for at least three hours prior to scanning. MR imaging was performed with Philips Gyroscan Intera 1.5 T CV Nova Dual scanner at Turku PET centre. High-resolution anatomical images (1 mm<sup>3</sup> resolution) were acquired using a T1-weighted sequence (TR 25 ms, TE 4.6 ms, flip angle 30°, scan time 376 s). Whole-brain functional data were acquired with echoplanar imaging (EPI) sequence, sensitive to the blood-oxygen-level-dependent (BOLD) signal contrast (TR = 3000 ms, TE = 50 ms, 90° flip angle, 192 mm FOV, 64×64 matrix, 62.5 kHz bandwidth, 4.0 mm slice thickness, 0.5 mm gap between slices, 30 interleaved slices acquired in ascending order). A total of 270 functional volumes were acquired, and the first 5 volumes were discarded to allow for equilibration effects. Data were preprocessed and analyzed using SPM5 software ([www.fil.ion.ucl.ac.uk/spm/](http://www.fil.ion.ucl.ac.uk/spm/)). The EPI images were sinc interpolated in time to correct for slice time differences and realigned to the first scan by rigid body transformations to correct for head movements. EPI and structural images were coregistered and normalized to the T1

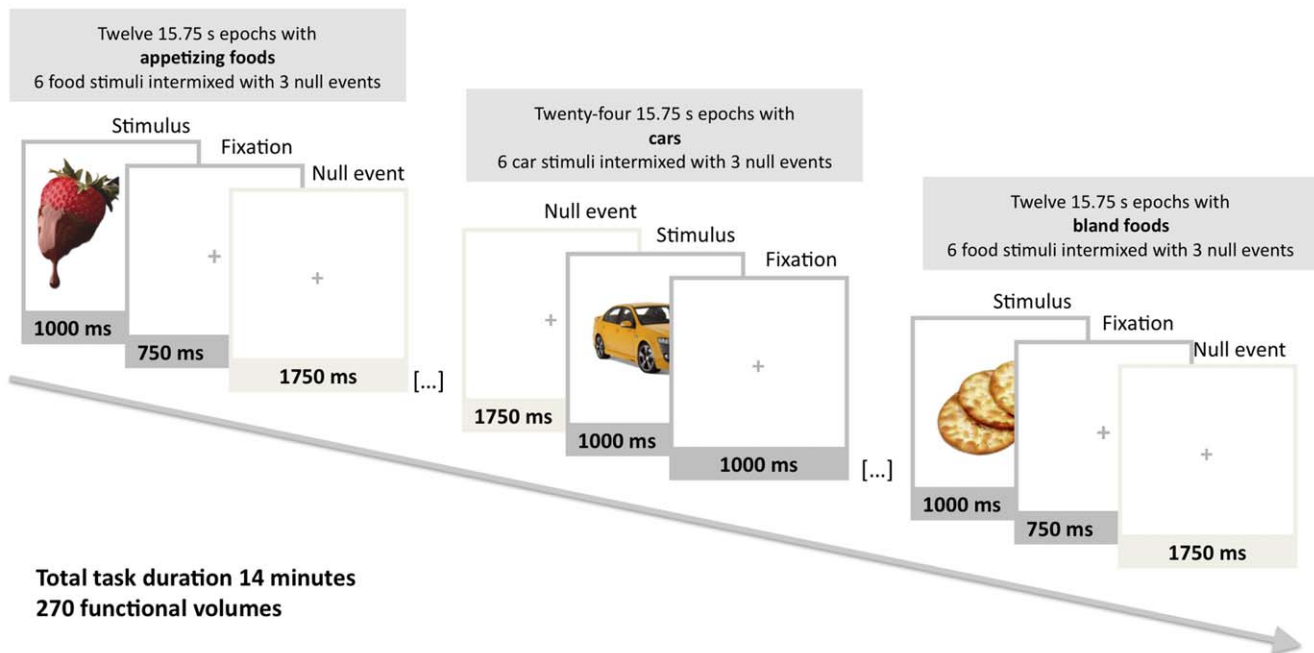

**Figure 1. Experimental design for fMRI and examples of the stimuli used.** The participants viewed alternating 15.75 epochs of appetizing foods, cars, and bland foods. Each epoch consisted of six experimental stimuli pseudorandomly intermixed with three null events. doi:10.1371/journal.pone.0031089.g001

standard template in MNI space (Montreal Neurological Institute (MNI) – International Consortium for Brain mapping) using linear and non-linear transformations, and smoothed with a Gaussian kernel of FWHM 8-mm.

### Analysis of regional effects

A whole-brain random effects model was implemented using a two-stage process (first and second level). This random-effects analysis assessed effects on the basis of inter-subject variance and thus allowed inferences about the population that the participants were drawn from. For each participant, we used a GLM to assess regional effects of task parameters on BOLD indices of activation. The model included three experimental conditions (appetizing foods, bland foods and cars) and effects of no interest (realignment parameters) to account for motion-related variance. Low-frequency signal drift was removed using a high-pass filter (cutoff 128 sec) and AR(1) modeling of temporal autocorrelations was applied. The individual contrast images were generated using the contrast appetizing – bland foods, as well as for the main effect of foods (i.e. appetizing and bland foods against other effects of interest). The second level analysis used these contrast images in a new GLM, and generated statistical images, that is, SPM-t maps. With balanced designs at first level (i.e. similar events for each subject, in similar numbers) this second level analysis closely approximates a true mixed effects design, with both within and between subject variance. Initial analysis revealed that none of the second-level between-groups contrasts was significant when strict false discovery rate (FDR) correction at  $p < .05$  was applied. Accordingly, the statistical threshold was set at  $p < .005$ , uncorrected, with a minimum cluster size of 20 contiguous voxels for the between-group comparisons.

### Psychophysiological interaction (PPI) in the general linear model (GLM)

The physiological connectivity between two brain regions can vary as a function of the psychological context [36] known as a

Psychophysiological Interaction (PPI). PPIs can be identified by general linear models sensitive to contextual modulation of task-related covariance. In contrast with dynamic causal modeling or structural equation modeling of network connectivity, PPIs do not require a specified anatomical model. Rather, one starts with a ‘source’ region and identifies any other ‘target’ voxels/clusters in the brain with which that source has context-dependent connectivity. Target regions need not correlate with the task or context alone, but the interactions between these factors. Significant PPIs do not in themselves indicate the direction or neurochemistry of causal influences between source and target regions, nor whether the connectivity is mediated by mono- or poly-synaptic connections, nor changes in structural neuroplasticity from epoch to epoch. However, they *do* indicate interactions between regional systems, and the results of PPIs accord with other connectivity methods such as dynamic causal modelling [37].

Right caudate nucleus was used as the source region for the connectivity analyses for the appetizing minus bland foods contrast. Global maximum (2, 8, 4) for this region in the second-level obese versus normal-weight contrast in the PET data analyses (see below) was used to derive a statistically independent estimate for the center of the source region; this effectively guarded against ‘double dipping’ in source region selection [38], and enabled theoretically plausible integration of the PET and fMRI data. A spherical ROI with a 10 mm radius was generated at this location. The time-series for each participant was computed by using the first eigenvariate from all voxel time series in the ROI. This BOLD time series was deconvolved to estimate a ‘neuronal time series’ for this region using the PPI-deconvolution parameter defaults in SPM5 [39]. The psychophysiological interaction term (PPI regressor) was calculated as the element-by-element product of the ROI neuronal time series and a vector coding for the main effect of task (i.e. 1 for appetizing foods, –1 for bland foods). This product was then re-convolved by the canonical hemodynamic response function (hrf). The model also included the main effects of task convolved by the hrf, the ‘neuronal time series’ for each

'source' and the movement regressors as effects of no interest. Subject-wise PPI models [36] were run, and contrast images were generated for positive and negative PPIs. This whole-brain analysis identified regions have greater or lesser change in connectivity with the source region according to context (i.e., appetizing versus bland foods). The contrast images were then entered into second-level GLM analyses for contrasts of interest, and SPM *t*-maps generated using Gaussian Random Field theory to make statistical inferences.

## Results

### Behavioral measurements

The stimulus valence ratings were analyzed with a 3 (stimulus: appetizing food vs. bland food vs. cars) × 2 (group: obese vs. normal-weight) mixed ANOVA. This revealed that the valence ratings differed significantly across stimulus categories,  $F(2,60) = 6.01$ ,  $p = .004$ ,  $\eta_p^2 = .17$ , but were similar across obese and normal-weight groups ( $F = 1.46$ ). Multiple comparisons with Bonferroni corrections revealed that participants rated appetizing foods as more pleasant than bland foods,  $t(31) = 4.67$ ,  $p < .001$ , or cars,  $t(31) = 2.76$ ,  $p = .01$ , but did not rate bland foods as more pleasant than cars,  $t(31) = .41$ . Hunger ratings were also equal across patient and control groups ( $p > .05$ ).

### Brain glucose metabolism

Obese subjects had significantly higher glucose metabolism in the right caudate nucleus than did normal-weight subjects ( $X = 4$ ,  $Y = 8$ ,  $Z = 4$ ,  $T = 3.97$ ,  $p = .03$ , SVC) (Figure 2), but not in any other *a priori* region of interest (amygdala, thalamus, insula, or orbitofrontal cortex).

### Regional effects in fMRI

Across all subjects, contrasting appetizing versus bland foods resulted in robust activation of the reward circuit. Activation foci were observed in the medial prefrontal cortex, anterior cingulate gyrus, right ventral striatum, bilateral posterior insula, and posterior cingulate gyrus and precuneus (Figure 3, Table 2). However, between-groups analysis revealed that coding for anticipatory reward was contingent on obesity. Responses to all foods (appetizing *and* bland) were higher in obese than in normal-

weight subjects in the left amygdala, hippocampus, posterior cingulate cortex and fusiform gyrus, as well as the right somatosensory cortex. However, responses were lower in obese than in normal-weight subjects in the left superior frontal gyrus. Table 3 presents a summary of these activation foci.

Next, we asked whether obese subjects would show greater functional responses specifically to appetizing rather than bland foods. To that end, we applied an interaction analysis between group (obese, normal-weight) and food type (appetizing, bland). Consistent with the prediction that obesity would be associated with hyperactivity in the reward circuit, the response to appetizing versus bland foods in the right caudate nucleus was greater in obese than in normal-weight individuals (Figure 4a, Table 4). In contrast, obese subjects had smaller functional responses to appetizing versus bland foods than did normal-weight subjects in the left insula, lateral frontal cortex, superior parietal lobule, right orbitofrontal cortex and superior temporal gyrus (Figure 4b, Table 4). Thus, obese subjects appeared to have an imbalance in regional functional responses to anticipated food reward: greater responses in the caudate nucleus and smaller responses in several frontal cortical regions.

Finally, to examine if tonic hyperactivity of the caudate nucleus observed in the  $[^{18}\text{F}]$  FDG PET scan would predict abnormal anticipatory reward on fMRI, we first extracted subject-wise GMR values in the caudate nucleus from the parametric GMR images. Next, we used these values as a regressor in a second-level model comparing the BOLD responses to appetizing versus bland food in fMRI. This analysis showed that increased glucose metabolism in the caudate nucleus predicted smaller responses to appetizing versus bland food specifically in the right lateral frontal cortex (Figure 5). This finding is consistent with insufficient inhibitory control of subcortical reward systems by the frontal cortex.

### Psychophysiological Interactions

Having found evidence for a central role of caudate nucleus in mediating abnormal anticipatory reward in obesity, we next asked whether this brain region has abnormal functional task-related connectivity to other key brain regions, such as those of the limbic system. That is, we asked which brain regions would be central in modulating the anticipatory reward-related activity in the caudate nucleus while viewing appetizing versus bland foods. We used

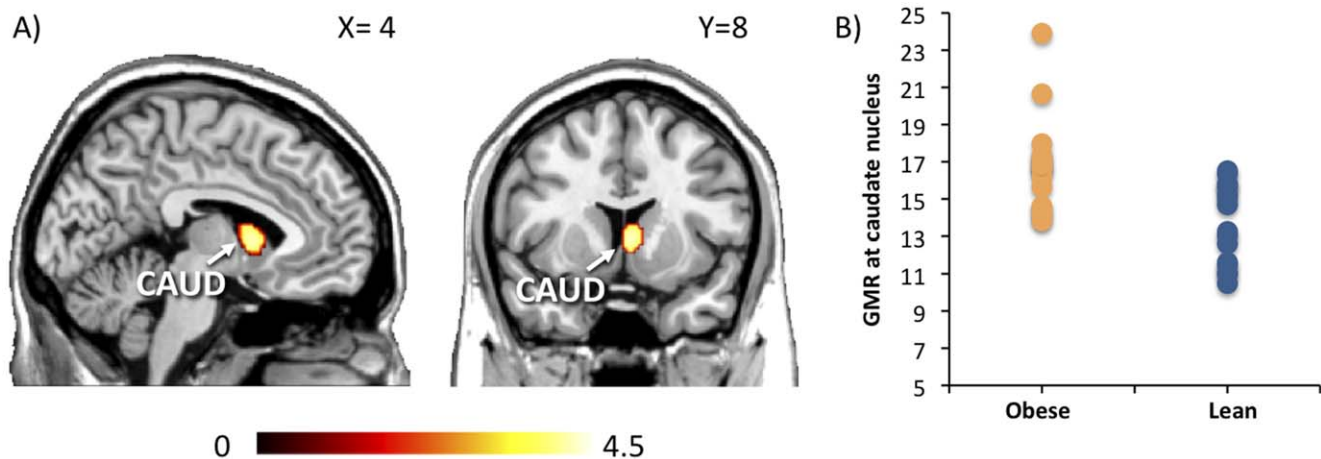

**Figure 2.** PET scans with 2-[ $^{18}\text{F}$ ] FDG during euglycemic hyperinsulinemia show that glucose metabolic rate (GMR,  $\mu\text{mol}/100 \text{ g}\cdot\text{min}$ ) in the right caudate nucleus ( $X = 4$ ,  $Y = 8$ ,  $Z = 4$ ) was significantly higher in obese rather than in normal-weight subjects ( $p < .05$ , SVC). Panel A shows the statistical parametric map of the between-group effect, panel B shows the subject-wise GMR values in the caudate nucleus.

doi:10.1371/journal.pone.0031089.g002

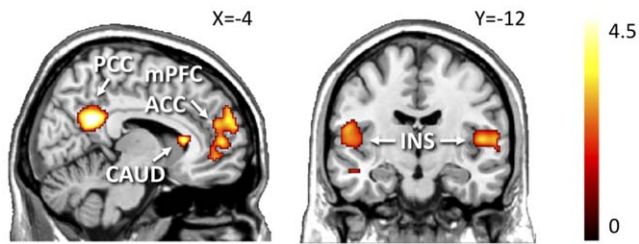

**Figure 3. Brain regions showing increased response to appetizing vs. bland foods across all subjects.** Appetizing foods increased activity in anterior (ACC) and posterior cingulate cortex (PCC), medial prefrontal cortex (mPFC), right caudate nucleus (CAUD) and bilateral insula (INS). The data are plotted at  $p < .005$ , uncorrected for visual inspection.  
doi:10.1371/journal.pone.0031089.g003

psychophysiological interactions to determine the functional connectivity of the caudate nucleus, using the voxel with the highest difference in glucose metabolism in the PET data as the center of the seed region. We found that obese subjects showed significantly stronger connectivity between right caudate nucleus and right basolateral amygdala ( $X=33, Y=-5, Z=-16, T=3.92, p < .005, \text{unc.}$ ), primary somatosensory cortex ( $X=39, Y=-13, Z=32, T=3.63, p < .005, \text{unc.}$ ) and posterior insula ( $X=30, Y=14, Z=18, T=3.47, p < .005, \text{unc.}$ ) than normal-weight subjects (Figure 6).

**Table 2. Brain regions showing increased response to appetizing versus bland foods across all subjects,  $p < .05$  (FDR corrected).**

| Region                                           | Laterality | X   | Y    | Z   | T    |
|--------------------------------------------------|------------|-----|------|-----|------|
| Cerebellum                                       | R          | 26  | -48  | -20 | 6.78 |
| Inferior occipital gyrus                         | L          | -16 | -100 | -6  | 6.58 |
| Posterior cingulate gyrus, Precuneus, Cuneus     | R          | 6   | -50  | 24  | 6.46 |
| Insula, Superior temporal gyrus                  | R          | 50  | -6   | 4   | 6.23 |
| Inferior occipital gyrus                         | R          | 28  | -96  | -12 | 6.07 |
| Superior frontal gyrus, Anterior Cingulate Gyrus | L          | -10 | 60   | 18  | 5.66 |
| Middle temporal gyrus                            | R          | 44  | -40  | 2   | 5.04 |
| Superior temporal gyrus                          | L          | -48 | -28  | 14  | 4.92 |
| Insula, Superior temporal gyrus                  | L          | -52 | -14  | 12  | 4.78 |
| Precuneus, Superior parietal lobule              | R          | 14  | -48  | 62  | 4.77 |
| Postcentral gyrus, Somatosensory cortex          | L          | -44 | -26  | 54  | 4.69 |
| Insula, Putamen                                  | L          | -34 | -20  | 2   | 4.38 |
| Caudate nucleus                                  | R          | 10  | 22   | 6   | 4.35 |
| Supplementary Motor Area                         | R          | 8   | -10  | 66  | 4.1  |
| Postcentral gyrus                                | L          | -24 | -42  | 56  | 3.98 |
| Middle and posterior cingulate gyrus             | R          | 2   | -28  | 34  | 3.87 |
| Middle frontal gyrus                             | L          | -24 | 26   | 40  | 3.86 |
| Middle temporal gyrus                            | L          | -46 | -68  | 20  | 3.84 |
| Fusiform gyrus                                   | L          | -26 | -52  | -16 | 3.83 |
| Middle cingulate gyrus                           | R          | 2   | -14  | 38  | 3.72 |

doi:10.1371/journal.pone.0031089.t002

**Table 3. Between-group (obese vs. normal-weight and normal-weight vs. obese) differences in cerebral responses to all (appetizing and bland) food pictures,  $p < .005$  (unc.).**

| Region                                                                    | Laterality | x   | y   | z   | T    |
|---------------------------------------------------------------------------|------------|-----|-----|-----|------|
| <b>Larger response to foods in obese versus normal-weight individuals</b> |            |     |     |     |      |
| Amygdala/Hippocampus                                                      | L          | -30 | -10 | -26 | 3.89 |
| Posterior cingulate cortex                                                | L          | 8   | -38 | 18  | 3.84 |
| Supramarginal gyrus (somatosensory cortex)                                | R          | 56  | -16 | 30  | 3.81 |
| Fusiform gyrus                                                            | L          | -40 | -58 | -10 | 3.76 |
| <b>Larger response to foods in normal-weight versus obese individuals</b> |            |     |     |     |      |
| Superior Frontal Gyrus                                                    | L          | -42 | 4   | 10  | 5.21 |

doi:10.1371/journal.pone.0031089.t003

**Discussion**

This study reveals the specific ways in which obesity modifies the responsiveness as well as functional connections of the reward circuit in the brain. Specifically, the results underline a central role for the dorsal caudate nucleus, a region promoting habitual learning and incentive motivation, in integrating various neural inputs in the process of anticipatory food reward. During hyperinsulinemia achieved with hyperinsulinemic euglycemic clamp, the dorsal caudate nucleus had higher basal glucose metabolism in obese subjects than in normal-weight subjects. The fMRI experiment showed that although the obese and normal-weight subjects gave similar self-reports to the pleasantness of the food stimuli, the stimuli elicited differential patterns of brain activation and changes in connectivity across the two groups. When appetizing and bland foods were contrasted with each other, the caudate nucleus showed greater response in the obese subjects. In contrast, obese subjects failed to activate cortical inhibitory regions, such as the dorsolateral and orbitofrontal cortices, in response to appetizing food; this phenomenon was also significantly correlated with higher basal glucose metabolism in the dorsal caudate nucleus. Finally, the very same region of the dorsal caudate nucleus that showed elevated glucose metabolism in obese versus normal-weight participants also showed increased connectivity with the amygdala and posterior insula in obese subjects

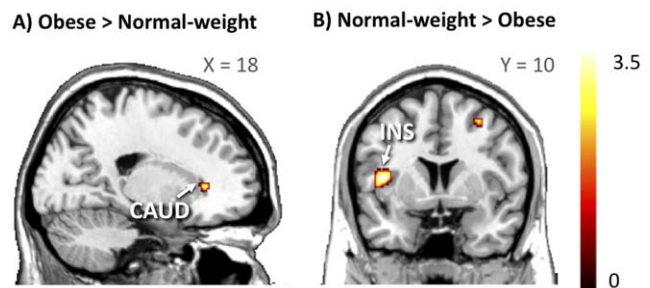

**Figure 4. Differential BOLD responses to appetizing and bland foods in normal-weight and obese subjects in the caudate nucleus and anterior insula.** Brain responses to appetizing vs. bland foods were larger in the head of the right caudate nucleus (CAUD) of the obese patients, whereas responses to appetizing vs. bland foods were larger in the right anterior insula (INS) of the normal-weight individuals. The data are plotted at  $p < .005$ , uncorrected for visual inspection.  
doi:10.1371/journal.pone.0031089.g004

**Table 4.** Between-group (obese vs. normal-weight and normal-weight vs. obese) differences in cerebral responses to appetizing versus bland foods,  $p < .005$  (unc.).

| Region                                                                                            | Laterality | x   | y   | z   | T    |
|---------------------------------------------------------------------------------------------------|------------|-----|-----|-----|------|
| <u>Larger response to appetizing versus bland foods in obese versus normal-weight individuals</u> |            |     |     |     |      |
| Caudate                                                                                           | R          | 18  | 30  | 4   | 4.77 |
| <u>Larger response to appetizing versus bland foods in normal-weight versus obese individuals</u> |            |     |     |     |      |
| Insula                                                                                            | L          | -42 | 4   | 10  | 5.21 |
| Orbitofrontal cortex                                                                              | R          | 20  | 34  | -8  | 4.83 |
| Orbitofrontal cortex (IFG)                                                                        | R          | 38  | 32  | -8  | 4.28 |
| Temporal pole                                                                                     | R          | 46  | 12  | -26 | 4.06 |
| Superior Temporal Gyrus                                                                           | R          | 52  | -38 | 18  | 3.99 |
| Superior frontal sulcus                                                                           | R          | 20  | 40  | 38  | 3.81 |
| Supramarginal Gyrus                                                                               | R          | 38  | -38 | 38  | 3.65 |
| Inferior Frontal Gyrus                                                                            | L          | -38 | 34  | 10  | 3.54 |
| Middle Frontal Gyrus                                                                              | R          | 30  | 6   | 54  | 3.53 |
| Middle Occipital Gyrus                                                                            | R          | 36  | -76 | 30  | 3.43 |
| Postcentral Gyrus                                                                                 | L          | -22 | -38 | 46  | 3.42 |
| Middle Temporal Gyrus                                                                             | R          | 60  | -24 | -10 | 3.41 |
| Supramarginal Gyrus                                                                               | R          | 48  | -32 | 40  | 3.37 |
| Superior Frontal Gyrus                                                                            | R          | 26  | 28  | 54  | 3.36 |
| Middle Cingulate Gyrus                                                                            | R          | 8   | -14 | 36  | 3.28 |
| Middle Occipital Gyrus                                                                            | L          | -30 | -74 | 22  | 3.25 |
| Superior Parietal Lobule                                                                          | L          | -20 | -64 | 44  | 3.24 |
| Middle Temporal Gyrus                                                                             | L          | -62 | -28 | 0   | 3.19 |
| Lingual Gyrus                                                                                     | L          | -8  | -80 | 0   | 3.16 |

doi:10.1371/journal.pone.0031089.t004

while they were viewing appetizing versus bland foods. Importantly, these effects were observed under conditions where participants were not deliberately paying attention to the content of the stimulus pictures. Accordingly, the results suggest that *implicit reward processing* of visual cues for eating is modulated by

obesity, which may explain why obese individuals have problems with restraining their eating upon seeing high-caloric foods. We must nevertheless note that it is possible that the participants could have been engaged to some extent in explicit reward processing, even though the behavioural task was independent of the food

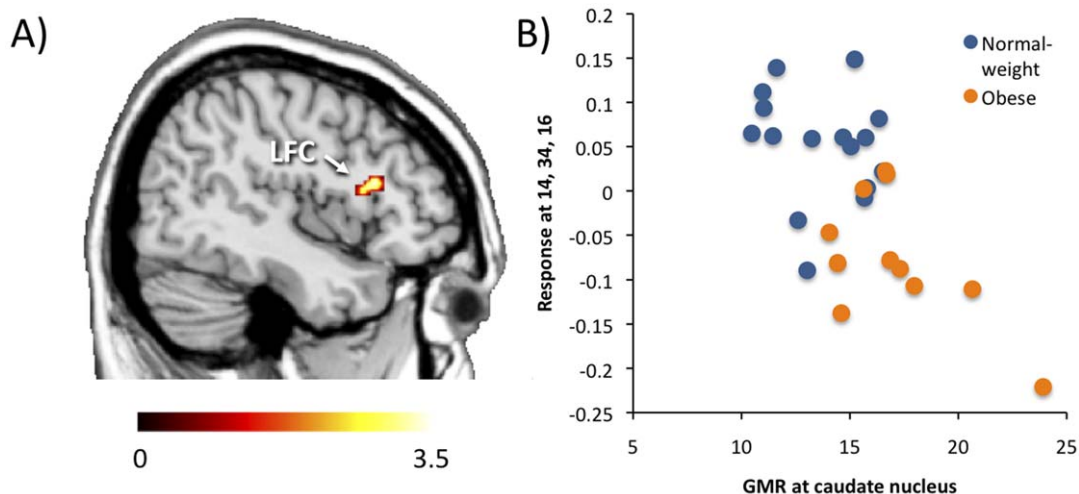

**Figure 5.** High glucose metabolic rate (GMR,  $\mu\text{mol}/100\text{ g}\cdot\text{min}$ ) in caudate nucleus during 2-[ $^{18}\text{F}$ ] FDG PET scan was negatively associated with responses to appetizing versus bland foods in right lateral frontal cortex (LFC) in the fMRI experiment. Panel A shows the region where the difference was observed, panel B shows a scatterplot of the GMRs and BOLD responses.

doi:10.1371/journal.pone.0031089.g005

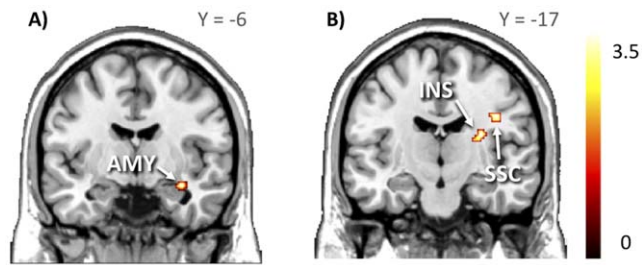

**Figure 6. Effective connectivity.** When viewing appetizing versus bland foods, the effective connectivity between right caudate nucleus and right amygdala (AMY), insula (INS) and somatosensory cortex (SSC) was greater in obese than in normal-weight subjects. The data are plotted at  $p < .005$ , uncorrected for visual inspection. doi:10.1371/journal.pone.0031089.g006

pictures' reward value. Accordingly, future studies need to establish whether obese and normal-weight individuals could differ with respect to implicit versus explicit reward processing.

### Regional Differences in the Caudate Nucleus

Dorsal caudate nucleus has been implicated in habitual stimulus-response learning, motivation and conditioning, and imaging studies in humans suggest that it contributes to variety of functions related to reward signaling and addictions. Patients with drug addiction show lower baseline  $D_2$  receptor ( $D_2R$ ) density in the striatum, and blunted dopamine release following the administration of the drug of abuse [40]. Food consumption is also associated with dopamine release in the dorsal striatum in healthy subjects, and the amount of dopamine released is correlated positively with ratings of food pleasantness [12]. In fMRI experiments, activation of the caudate nucleus has been associated with self-reported craving for specific foods [8], and obese subjects have been found to show elevated striatal responses to food images [10]. Obese subjects have also lowered baseline striatal  $D_2R$  density, and it has been proposed that this may reflect downregulation which compensates frequent transient dopamine increases due to perpetual overstimulation of the reward circuit by drug use or eating [11].

By using the hyperinsulinemic clamp, we simulated a situation where the body is in a satiated state in terms of insulin signaling. Although this approach does not completely simulate physiological satiety due to a lack of orosensory stimulation and release of hormones from the gut, placebo-controlled intravenous glucose has been shown to increase hormonal markers of satiety [41] and dopaminergic activity in the reward circuit in males [42]. We found that the dorsal striatum of the obese subjects remains hyperactive in comparison to normal-weight subjects during hyperinsulinemic clamp. As clamping maintains stable blood glucose levels, the elevated glucose metabolism in the obese subjects during clamp suggests the caudate nucleus of the obese subjects may contribute to food craving even when blood glucose concentration cannot decrease. Moreover, because of its involvement in implicit learning and habit formation, the caudate may contribute to processing of both implicit (peripheral) and explicit (visual, orosensory) satiety signals. These signals could subsequently lead to overeating even when the body would not require additional energy intake.

It has been established that in obese subjects,  $D_2R$  availability in striatum is negatively associated with frontocortical glucose metabolism [43]. Our combined PET-fMRI data paralleled these findings. When glucose metabolism in caudate nucleus was used as a regressor for modeling the functional responses to appetizing

versus bland foods in fMRI, we found a significant negative association with glucose metabolism in the caudate nucleus and prefrontal BOLD responses (Figure 5). Accordingly, failure to engage the prefrontal mechanisms contributing to inhibitory control and salience attribution could promote overeating by lowering the threshold for food-induced reward signaling in the caudate nucleus. However, it should also be noted that some prior studies [19] have reported *elevated* frontal responses to food pictures in obese versus normal-weight individuals. It is likely that these discrepancies across studies reflect task-dependent engagement of the frontal cortex: whereas our study involved implicit processing of briefly presented food cues, Rothenmund and colleagues employed relatively long stimulus presentation with a memory task. It is thus possible that the obese individuals may fail to activate the cognitive control circuits particularly when they are not explicitly processing the food items they are viewing. Accordingly, this suggests that even 'unseen' or unattended food pictures in various advertisements could trigger powerful urges for eating in obese individuals.

### Effective Connectivity of Caudate Nucleus and Amygdala

The amygdala is involved in early stages of reward processing [44], and it shows consistent responses to visual presentations of foods [6,22]. Individual differences in both reward drive [21] and body weight [10] are known to influence amygdala responses to visual presentations of foods. In the present study we also found that amygdala responses to foods were elevated in the obese subjects. Moreover, when effective connectivity patterns (PPIs) of caudate nucleus were inspected, we found that the connectivity of the caudate nucleus and the ipsilateral amygdala was elevated in the obese subjects. In general sense, these data accord with prior findings in normal-weight subjects showing that effective connectivity between amygdala and striatum is influenced by individual differences in self-reported desire to eat upon the sight of foods ('external food sensitivity') [22]. Nevertheless, whereas prior studies have found that particularly the ventral striatum is involved in reward anticipation [21] and that coupling between ventral striatum (nucleus accumbens) and amygdala is influenced by external food sensitivity [22], we found that obesity influenced the coupling between the amygdala and more dorsal parts of the caudate nucleus. The evidence regarding the role of dorsal striatum in reward processing is rather mixed, with some studies linking it to processing anticipatory [45] and others to consummatory [46] rewards. Nevertheless, the role of dorsal striatum in encoding action-outcome associations for potential rewards is much better established [47,48]. Consequently, we propose that repeated exposures to palatable foods in obesity result in strong food stimulus-reward response associations and preferences, and implicitly engaged outcome evaluations regarding the potential rewards in obese individuals thus modulate the interconnectivity between the amygdala and the dorsal striatum upon sight of foods.

The interpretation of a significant PPI is that there is differential engagement of anatomical connections as a function of psychological context. Although the PPI cannot be used to reveal whether or not such connections exist, it is likely that the PPIs we observed reflect changes in the engagement of direct anatomical connections between the seed and target regions because such direct anatomical connections between the striatum and amygdala are supported by tracing studies in other primates [49,50]. Nevertheless, the PPIs cannot be used to infer the directionality of the observed connectivity, hence we cannot say whether i) increased glucose metabolism in the caudate nucleus increases the connectivity between the caudate nucleus and amygdala or ii)



increased inputs from amygdala increase the glucose metabolism in caudate nucleus.

Amygdala neurons facilitate reward seeking via their projections to the striatum [44]. Stimulation of the  $\mu$ -opioid receptors in the striatum triggers overeating, but this can be blocked by inactivation of the amygdala [51,52]. Accordingly, elevated amygdalo-striatal connectivity may lead to tonic increases in the activity of the caudate nucleus, which could be the critical mechanism explaining overeating in obesity. Taken together, amygdala might be involved in anticipated food reward by assigning emotional valence to appetizing food cues and influencing learned and compulsive eating patterns by enhanced connectivity with the dorsal caudate nucleus.

### Effective Connectivity of Caudate Nucleus and Insula

The PPI analyses revealed that the interconnectivity between dorsal striatum and posterior insula was elevated in the obese versus normal-weight subjects, whereas regional responses to appetizing versus bland foods in the *anterior* insula were smaller in the obese subjects. The anterior insula integrates autonomic and visceral signals into motivational and emotional functions, whereas the posterior insula is thought to underlie somatosensory, vestibular and motor integration as well as monitoring bodily states [53]. Recent work also points that somatosensory signaling in the insula may contribute significantly to addiction, particularly with urges to consume the drug of abuse (see review in ref. [53]). Prior PET and fMRI studies have linked insula to processing of pleasantness of external food cues [8,9,46], but peripheral signals such as leptin also influence insular response to seeing foods. In leptin-deficient adults, insular responses to appetizing foods are larger during leptin-deficiency rather than during leptin replacement [54]. Moreover, in obese subjects with leptin deficiency, leptin replacement dampens insular responses to viewing appetizing foods [55]. As the insula processes both internal (i.e. hormonal) and external (i.e. visual) food-related cues [56], disruptions in this integration of internal and external cues may render obese subjects more prone to overeating upon the sight of foods due to the elevated connectivity from insula and dorsal striatum. Since posterior insula is involved in monitoring bodily states, enhanced connectivity between posterior insula and dorsal caudate nucleus might imply that recalled representations of post-prandial somatic states by the insula might potentially reinforce feeding behaviors through incentive learning subserved by the dorsal caudate nucleus [18]. Consistent with this notion, the caudate nucleus also showed higher task-related connectivity with somatosensory cortex in obesity, confirming that mere visual cues of foods might trigger somatic sensations associated with eating. These sensations may further promote feeding even in the absence of physiological hunger signals [15]. Nevertheless, it must be noted that some prior studies have found *elevated* anterior insular responses to expected and consummatory food-related rewards in obese rather than in lean individuals [10,57]. Although we have no clear explanation to these discrepant findings, it is possible that they may reflect differences in the obese subject populations involved in the studies, such as eating history and habits as well as genetic and hormonal factors.

### Limitations and future directions

One obvious limitation of the present study was that despite a large sample size ( $n = 35$ ) the between-group comparisons for

fMRI data were not significant when corrected for multiple comparisons. Although the between-group differences were observed in predicted regions, some caution should be warranted when interpreting the findings. Furthermore, it must be stressed that we were not able to fully delineate the exact psychological mechanism that results in elevated brain responses to food pictures in obese individuals. Although we acquired ratings of the perceived pleasantness ('liking') of the foods, these were similar across obese and normal-weight individuals. Accordingly, elevated liking of appetizing foods in obesity is unlikely to contribute to the differences in brain responses. However, it could be speculated that food *craving* rather than liking could be the key factor that modulates brain responses to food pictures in obesity. In support of this hypothesis, it has been shown that although obese and normal-weight individuals 'like' foods similarly, stress-induced food craving is much higher in obese individuals [58]. In future functional imaging studies, it would thus be imperative to disentangle the 'craving' and 'liking' responses to foods in obese versus normal-weight individuals. Furthermore, given that craving responses are mediated by the dopaminergic link of the reward circuit, [24], it would be imperative to conduct combined neurotransmitter-PET-fMRI studies in which one could test whether, for example, striatal dopamine availability in obese vs. lean individuals predicts reward circuit's responses to external stimulation with foods.

### Conclusion

We show that obesity is associated with elevated glucose metabolism of the caudate nucleus, as well as modified regional responses and altered connectivity of the reward circuit when seeing appetizing versus bland foods. These data parallel with the findings on altered brain functioning in addictive disorders, and support the view that obesity may share a common neural substrate with addictions [2,59]. Specifically, enhanced sensitivity to external food cues in obesity may involve abnormal stimulus-response learning and incentive motivation subserved by the dorsal caudate nucleus, which in turn may be due to abnormally high input from the amygdala and posterior insula and dysfunctional inhibitory control by the frontal cortical regions. These functional changes in the responsiveness and interconnectivity of the reward circuit and cognitive control systems could be a critical mechanism that explains overeating in obesity.

### Acknowledgments

The study was conducted within the Finnish Centre of Excellence in Molecular Imaging in Cardiovascular and Metabolic Research, supported by the Academy of Finland, the University of Turku, the Turku University Hospital, and Åbo Academy University. We thank the Turku PET Centre radiographers for their help with the data acquisition as well as our participants for making this study possible.

### Author Contributions

Conceived and designed the experiments: LN JH PN. Performed the experiments: LN JH JCH HI MML PS. Analyzed the data: LN JH JCH HI. Wrote the paper: LN JH PN.

### References

1. WHO (2000) Obesity: preventing and managing the global epidemic. Report of a WHO consultation. World Health Organ Tech Rep Ser 894: i–xii, 1–253.
2. Volkow ND, Wise RA (2005) How can drug addiction help us understand obesity? *Nature Neuroscience* 8: 555–560.

3. Berridge KC (1996) Food reward: Brain substrates of wanting and liking. *Neuroscience and Biobehavioral Reviews* 20: 1–25.
4. Ikemoto S, Panksepp J (1999) The role of nucleus accumbens dopamine in motivated behavior: a unifying interpretation with special reference to reward-seeking. *Brain Research Reviews* 31: 6–41.
5. Kelley AE (2004) Ventral striatal control of appetitive motivation: Role in ingestive behavior and reward-related learning. *Neuroscience and Biobehavioral Reviews* 27: 765–776.
6. Killgore WDS, Young AD, Femia LA, Bogorodzki P, Rogowska J, et al. (2003) Cortical and limbic activation during viewing of high- versus low-calorie foods. *NeuroImage* 19: 1381–1394.
7. LaBar KS, Gitelman DR, Parrish TB, Kim YH, Nobre AC, et al. (2001) Hunger selectively modulates corticolimbic activation to food stimuli in humans. *Behavioral Neuroscience* 115: 493–500.
8. Pelchat ML, Johnson A, Chan R, Valdez J, Ragland JD (2004) Images of desire: food-craving activation during fMRI. *NeuroImage* 23: 1486–1493.
9. Wang GJ, Volkow ND, Telang F, Jayne M, Ma J, et al. (2004) Exposure to appetitive food stimuli markedly activates the human brain. *NeuroImage* 21: 1790–1797.
10. Stoeckel LE, Weller RE, Cook Iii EW, Twieg DB, Knowlton RC, et al. (2008) Widespread reward-system activation in obese women in response to pictures of high-calorie foods. *NeuroImage* 41: 636–647.
11. Wang GJ, Volkow ND, Logan J, Pappas NR, Wong CT, et al. (2001) Brain dopamine and obesity. *Lancet* 357: 354–357.
12. Small DM, Jones-Gotman M, Dagher A (2003) Feeding-induced dopamine release in dorsal striatum correlates with meal pleasantness ratings in healthy human volunteers. *NeuroImage* 19: 1709–1715.
13. Kelley AE, Berridge KC (2002) The neuroscience of natural rewards: Relevance to addictive drugs. *Journal of Neuroscience* 22: 3306–3311.
14. Volkow ND, Wang GJ, Fowler JS, Telang F (2008) Overlapping neuronal circuits in addiction and obesity: evidence of systems pathology. *Philosophical Transactions of the Royal Society B-Biological Sciences* 363: 3191–3200.
15. Cornell CE, Rodin J, Weingarten H (1989) Stimulus-induced eating when satiated. *Physiol Behav* 45.
16. Koob GF, Volkow ND (2010) Neurocircuitry of Addiction. *Neuropsychopharmacology* 35: 217–238.
17. Volkow ND, Wang GJ, Telang F, Fowler JS, Thanos PK, et al. (2008) Low dopamine striatal D2 receptors are associated with prefrontal metabolism in obese subjects: Possible contributing factors. *NeuroImage* 42: 1537–1543.
18. Verdejo-García A, Bechara A (2009) A somatic marker theory of addiction. *Neuropharmacology* 56: 48–62.
19. Rothenmund Y, Preuschhof C, Böhner G, Bauknecht H-C, Klingebiel R, et al. (2007) Differential activation of the dorsal striatum by high-calorie visual food stimuli in obese individuals. *NeuroImage* 37: 410–421.
20. Franken IHA, Muris P (2005) Individual differences in reward sensitivity are related to food craving and relative body weight in healthy women. *Appetite* 45: 198–201.
21. Beaver JB, Lawrence AD, van Ditzhuijzen J, Davis MH, Woods A, et al. (2006) Individual differences in reward drive predict neural responses to images of food. *Journal of Neuroscience* 26: 5160–5166.
22. Passamonti L, Rowe JB, Schwarzbauer C, Ewbank MP, von dem Hagen E, et al. (2009) Personality Predicts the Brain's Response to Viewing Appetizing Foods: The Neural Basis of a Risk Factor for Overeating. *J Neurosci* 29: 43–51.
23. Dagher A (2009) The neurobiology of appetite: hunger as addiction. *International Journal of Obesity* 33: S30–S33.
24. Berridge KC, Ho C-Y, Richard JM, DiFeliceantonio AG (2010) The tempted brain eats: Pleasure and desire circuits in obesity and eating disorders. *Brain Research* 1350: 43–64.
25. Stoeckel LE, Kim J, Weller RE, Cox JE, Cook Iii EW, et al. (2009) Effective connectivity of a reward network in obese women. *Brain Research Bulletin* 79: 388–395.
26. Sokoloff L (1999) Energetics of functional activation in neural tissues. *Neurochemical Research* 24: 321–329.
27. DeFronzo RA, Tobin JD, Andres R (1979) Glucose clamp technique: a method for quantifying insulin secretion and resistance. *Am J Physiol* 237: E214–E223.
28. Bradley MM, Lang PJ (1994) Measuring emotion - The Self-Assessment Mannequin and the semantic differential. *Journal of Behavior Therapy and Experimental Psychiatry* 25: 49–59.
29. Kaisti KK, Langsjö JW, Aalto S, Oikonen V, Sipila H, et al. (2003) Effects of sevoflurane, propofol and adjunct nitrous oxide on regional cerebral blood flow, oxygen consumption, and blood volume in humans. *Anesthesiology* 99: 603–613.
30. Kaisti KK, Metsahonkala L, Teras M, Oikonen V, Aalto S, et al. (2002) Effects of surgical levels of propofol and sevoflurane anesthesia on cerebral blood flow in healthy subjects studied with positron emission tomography. *Anesthesiology* 96: 1358–1370.
31. Hamacher K, Coenen HH, Stocklin G (1986) Efficient Stereospecific Synthesis of No-Carrier-Added 2-[F-18]-Fluoro-2-Deoxy-D-Glucose Using Aminopolyether Supported Nucleophilic-Substitution. *Journal of Nuclear Medicine* 27: 235–238.
32. Graham MM, Muzi M, Spence AM, O'Sullivan F, Lewellen TK, et al. (2002) The FDG lumped constant in normal human brain. *Journal of Nuclear Medicine* 43: 1157–1166.
33. Maldjian JA, Laurienti PJ, Kraft RA, Burdette JH (2003) An automated method for neuroanatomic and cytoarchitectonic atlas-based interrogation of fMRI data sets. *NeuroImage* 19: 1233–1239.
34. Tzourio-Mazoyer N, Landeau B, Papathanassiou D, Crivello F, Etard O, et al. (2002) Automated anatomical labeling of activations in SPM using a macroscopic anatomical parcellation of the MNI MRI single-subject brain. *NeuroImage* 15: 273–289.
35. Amaro E, Barker GJ (2006) Study design in MRI: Basic principles. *Brain and Cognition* 60: 220–232.
36. Friston KJ, Buechel C, Fink GR, Morris J, Rolls E, et al. (1997) Psychophysiological and Modulatory Interactions in Neuroimaging. *NeuroImage* 6: 218–229.
37. Passamonti L, Rowe JB, Ewbank M, Hampshire A, Keane J, et al. (2008) Connectivity from the ventral anterior cingulate to the amygdala is modulated by appetitive motivation in response to facial signals of aggression. *NeuroImage* 43: 562–570.
38. Kriegeskorte N, Simmons WK, Bellgowan PSF, Baker CI (2009) Circular analysis in systems neuroscience: the dangers of double dipping. *Nature Neuroscience* 12: 535–540.
39. Gitelman DR, Penny WD, Ashburner J, Friston KJ (2003) Modeling regional and psychophysiological interactions in fMRI: the importance of hemodynamic deconvolution. *NeuroImage* 19: 200–207.
40. Volkow ND, Fowler JS, Wang GJ, Swanson JM (2004) Dopamine in drug abuse and addiction: results from imaging studies and treatment implications. *Molecular Psychiatry* 9: 557–569.
41. Haltia LT, Savontaus E, Vahlberg T, Rinne JO, Kaasinen V (2010) Acute hormonal changes following intravenous glucose challenge in lean and obese human subjects. *Scandinavian Journal of Clinical & Laboratory Investigation* 70: 275–280.
42. Haltia LT, Rinne JO, Merisaari H, Maguire RP, Savontaus E, et al. (2007) Effects of intravenous glucose on Dopaminergic function in the human brain in vivo. *Synapse* 61: 748–756.
43. Volkow ND, Wang G-J, Telang F, Fowler JS, Thanos PK, et al. (2008) Low dopamine striatal D2 receptors are associated with prefrontal metabolism in obese subjects: Possible contributing factors. *NeuroImage* 42: 1537–1543.
44. Ambroggi F, Ishikawa A, Fields HL, Nicola SM (2008) Basolateral amygdala neurons facilitate reward-seeking behavior by exciting nucleus accumbens neurons. *Neuron* 59: 648–661.
45. Volkow ND, Wang GJ, Fowler JS, Logan J, Jayne M, et al. (2002) “Nonhedonic” food motivation in humans involves dopamine in the dorsal striatum and methylphenidate amplifies this effect. *Synapse* 44: 175–180.
46. Small DM, Zatorre RJ, Dagher A, Evans AC, Jones-Gotman M (2001) Changes in brain activity related to eating chocolate - From pleasure to aversion. *Brain* 124: 1720–1733.
47. O'Doherty J, Dayan P, Schultz J, Deichmann R, Friston K, et al. (2004) Dissociable roles of ventral and dorsal striatum in instrumental conditioning. *Science* 304: 452–454.
48. Balleine BW, Delgado MR, Hikosaka O (2007) The role of the dorsal striatum in reward and decision-making. *Journal of Neuroscience* 27: 8161–8165.
49. Russchen FT, Bakst I, Amaral DG, Price JL (1985) The Amygdalostriatal Projections in the Monkey - an Anterograde Tracing Study. *Brain Research* 329: 241–257.
50. Friedman DP, Aggleton JP, Saunders RC (2002) Comparison of hippocampal, amygdala, and perirhinal projections to the nucleus accumbens: Combined anterograde and retrograde tracing study in the macaque brain. *Journal of Comparative Neurology* 450: 345–365.
51. Will MJ, Franzblau EB, Kelley AE (2004) The amygdala is critical for opioid-mediated binge eating of fat. *NeuroReport* 15: 1857–1860.
52. Baldo BA, Alsene KM, Negron A, Kelley AE (2005) Hyperphagia induced by GABAA receptor-mediated inhibition of the nucleus accumbens shell: Dependence on intact neural output from the central amygdaloid region. *Behavioral Neuroscience* 119: 1195–1206.
53. Naqvi NH, Bechara A (2009) The hidden island of addiction: the insula. *Trends in Neurosciences* 32: 56–67.
54. Baicy K, London ED, Monterosso J, Wong M-L, Delibasi T, et al. (2007) Leptin replacement alters brain response to food cues in genetically leptin-deficient adults. *Proceedings of the National Academy of Sciences* 104: 18276–18279.
55. Rosenbaum M, Sy M, Pavlovich K, Leibel RL, Hirsch J (2008) Leptin reverses weight loss-induced changes in regional neural activity responses to visual food stimuli. *The Journal of Clinical Investigation* 118: 2583–2591.
56. Cornier M-A, Salzberg AK, Endly DC, Bessen DH, Rojas DC, et al. (2009) The Effects of Overfeeding on the Neuronal Response to Visual Food Cues in Thin and Reduced-Obese Individuals. *PLoS ONE* 4: e6310.
57. Stice E, Spoor S, Bohon C, Veldhuizen MG, Small DM (2008) Relation of Reward From Food Intake and Anticipated Food Intake to Obesity: A Functional Magnetic Resonance Imaging Study. *Journal of Abnormal Psychology* 117: 924–935.
58. Lemmens SG, Rutters F, Born JM, Westerterp-Plantenga MS (in press) Stress augments food ‘wanting’ and energy intake in visceral overweight subjects in the absence of hunger *Physiology & Behavior* In Press, Corrected Proof.
59. Nathan PJ, Bullmore ET (2009) From taste hedonics to motivational drive: central mu-opioid receptors and binge-eating behaviour. *International Journal of Neuropsychopharmacology* 12: 995–1008.
